# Supplementary material
Source: PubMed Central journal article supplement (PMC4136587)
Supplement: 1323586111_pnas.201323586SI.pdf [file 1323586111_pnas.201323586SI.pdf]

# Supporting Information

Lawson et al. 10.1073/pnas.1323586111

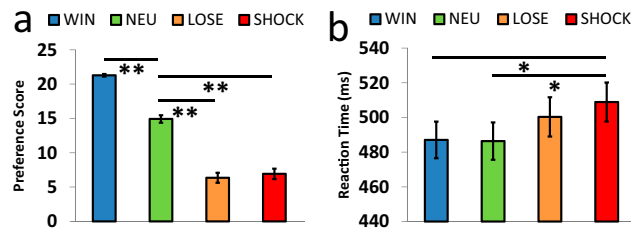

**Fig. S1.** Pilot data: indices of conditioning. Pilot data from a study conducted outside the scanner [ $n = 20$ ; 10 female; mean age = 38.5 (SD = 8.03) y]. Subjects underwent a thresholding procedure as in the main study, rating each shock on a visual analog scale from 0 (not painful) to 10 (worst imaginable pain). Because subject movement was not a consideration in this pilot study, the average shock strength tolerated by subjects was higher: 20.3 (SEM = 4.76) mA. Subjects preferred to see loss and shock conditioned stimuli (CSs) least [significant effect of CS type:  $F(3,57) = 105.56$ ,  $P < 0.001$ ] (A), and subjects responded slowest in the flicker detection task when shock CSs were on screen [significant effect of CS type:  $F(3,57) = 4.58$ ,  $P = 0.006$ ] (B). Error bars represent SEM. \* $P < 0.01$ ; \*\* $P < 0.001$ .

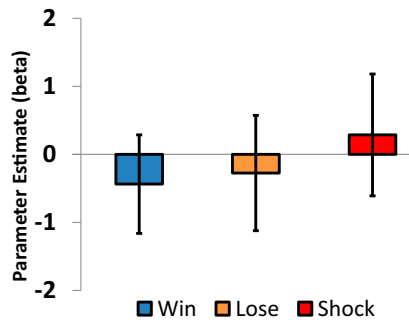

**Fig. S2.** Left habenula responses. Extracted blood oxygen level-dependent responses from the left habenula correspond to the dynamically changing values of win, loss, and shock CSs, averaged across subjects. The linear response profile is similar to the right habenula but is not statistically significant.

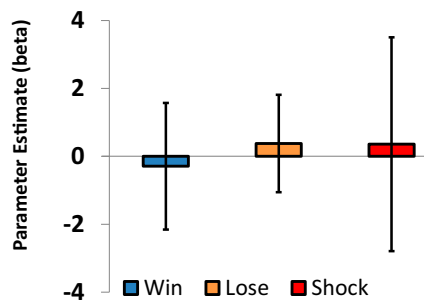

**Fig. S3.** Medial dorsal (MD) thalamus results. No significant blood oxygen level-dependent response to the value of win, loss, and shock CSs was detected in the combined left and right MD thalamus region of interest. Error bars represent SEM.

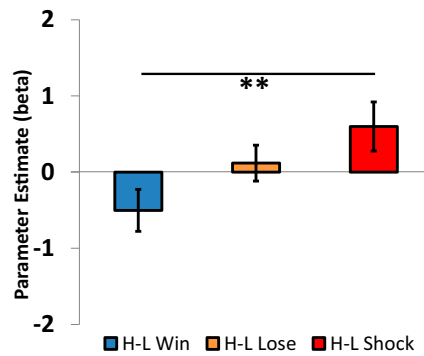

**Fig. S4.** Habenula response to high- vs. low-probability CS value. Extracted habenula blood oxygen level-dependent response (averaged across left and right) corresponds to the contrast of high- vs. low-probability (H-L) win, loss, and shock CSs, separate from trial-by-trial fluctuations in CS value. Error bars represent SEM.

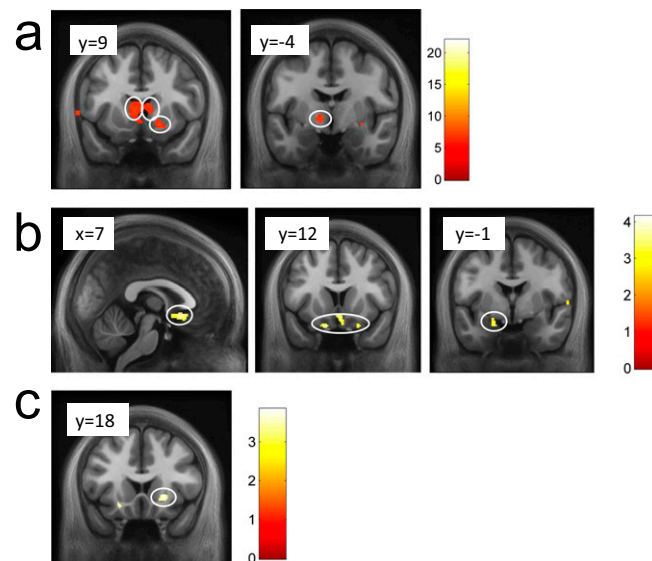

**Fig. 55.** Whole-brain connectivity analysis. (A) "Seed-based" connectivity (main effect of the physiological variable) over the entire functional MRI (fMRI) time series between the right habenula (seed region) and the right ventral striatum, bilateral medial wall of the caudate, and globus pallidus (images thresholded at  $P < 0.05$ , whole-brain family-wise error corrected at the voxel level). (B) Psychophysiological interaction analysis showing increased coupling between the right habenula and Brodmann area 25/posterior orbitofrontal cortex (Left and Center) and amygdala (Right) as a function of increasing shock CS value. Note that these regions were not included in our a priori regions of interest and are presented for information only. (C) Psychophysiological interaction analysis showing increased coupling between the right habenula and the right ventral striatum as a function of increasing win CS value (significant following small-volume correction in our striatal region of interest). Images in B and C are thresholded at  $P < 0.005$  (uncorrected), with a cluster threshold ( $k$ )  $\geq 10$ , and are overlaid on the average normalized anatomical image; color bars represent  $t$  values.

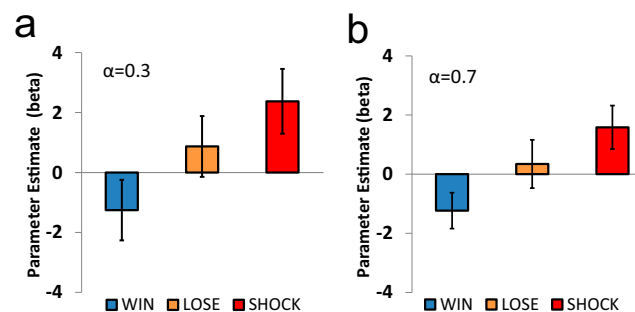

**Fig. S6.** Habenula ROI results at different learning rates. Similar results were obtained when using learning rates of (A)  $\alpha = 0.3$  and (B)  $\alpha = 0.7$  (original  $\alpha = 0.5$ ). Error bars represent SEM.

**Table S1. Whole-brain analysis: All activations for contrasts pertaining to the value of win conditioned stimuli (CSs), loss CSs, and shock CSs (exploratory  $P < 0.005$ ,  $k \geq 10$ )**

| <i>k</i>    | <i>t</i> | <i>Z</i> | MNI coordinates |          |          | Region                             |
|-------------|----------|----------|-----------------|----------|----------|------------------------------------|
|             |          |          | <i>x</i>        | <i>y</i> | <i>z</i> |                                    |
| Shock value |          |          |                 |          |          |                                    |
| 65          | 4.68     | 3.85     | -68             | -18      | 17       | Parietal operculum                 |
| 318         | 3.85     | 3.33     | 6               | -21      | 2        | Centromedian thalamic nucleus      |
|             | 3.52     | 3.10     | 12              | -17      | 5        | Ventrolateral thalamic nucleus     |
|             | 3.14     | 2.82     | -3              | -11      | 2        | Anterior thalamus                  |
| 68          | 3.60     | 3.16     | -17             | -6       | 2        | Globus pallidus*                   |
| 106         | 3.51     | 3.09     | -42             | -60      | 14       | Posterior superior temporal sulcus |
| 55          | 3.48     | 3.07     | -44             | -5       | 12       | Frontal operculum                  |
| 17          | 3.47     | 3.07     | -63             | 5        | 11       | Precentral gyrus                   |
| 44          | 3.43     | 3.03     | 56              | 0        | 8        | Precentral gyrus                   |
| 37          | 3.31     | 2.95     | -14             | -27      | -8       | Medial geniculate nucleus          |
| 12          | 3.03     | 2.74     | -3              | -56      | 20       | Posterior cingulate gyrus          |
| Lose value  |          |          |                 |          |          |                                    |
| 481         | 4.85     | 3.96     | 65              | -8       | 6        | Anterior temporal gyrus            |
|             | 3.25     | 2.90     | 53              | -12      | -5       | Anterior superior temporal cortex  |
| 467         | 4.19     | 3.55     | -39             | -65      | 17       | Middle temporal gyrus              |
|             | 3.28     | 2.92     | -48             | -51      | 12       | Posterior superior temporal sulcus |
| 625         | 4.11     | 3.50     | 38              | -66      | 14       | Middle temporal gyrus              |
|             | 3.92     | 3.38     | 51              | -63      | 14       | Posterior superior temporal sulcus |
|             | 3.29     | 2.93     | 24              | -74      | 18       | Angular gyrus                      |
| 64          | 3.69     | 3.22     | 30              | 63       | -12      | Inferior frontal gyrus             |
| 163         | 3.46     | 3.06     | -63             | -21      | 9        | Superior temporal gyrus            |
|             | 3.16     | 2.84     | -68             | -17      | 2        |                                    |
| 38          | 3.27     | 2.92     | -62             | 8        | 15       | Inferior frontal gyrus             |
| 16          | 3.25     | 2.91     | -60             | -39      | 20       | Posterior superior temporal gyrus  |
| 77          | 3.21     | 2.87     | -38             | -17      | 8        | Posterior insula                   |
|             | 3.07     | 2.77     | -32             | -14      | 3        | Insular claustrum                  |
| 22          | 3.18     | 2.85     | 71              | -23      | 2        | Superior temporal gyrus            |
| 10          | 3.17     | 2.85     | 59              | 12       | -11      | Anterior superior temporal gyrus   |
| 17          | 3.14     | 2.82     | 33              | -36      | 5        | Caudate nucleus, tail              |
| Win value   |          |          |                 |          |          |                                    |
| 668         | 4.31     | 3.63     | -56             | 2        | 3        | Lateral precentral gyrus           |
|             | 4.06     | 3.47     | -50             | 3        | 12       | Precentral gyrus                   |
| 228         | 4.25     | 3.59     | 38              | -21      | 3        | Posterior insula                   |
|             | 2.90     | 2.64     | 29              | -14      | 8        | Posterior putamen                  |
| 886         | 3.92     | 3.38     | 12              | 48       | 3        | Dorsal anterior cingulate          |
|             | 3.47     | 3.06     | -9              | 51       | 8        | Dorsal anterior cingulate          |
|             | 3.30     | 2.95     | -11             | 59       | -3       | Rostrolateral prefrontal cortex    |
| 60          | 3.59     | 3.15     | -45             | 39       | -20      | Lateral inferior frontal gyrus     |
| 41          | 3.35     | 2.98     | 26              | -18      | 15       | Putamen, posterior                 |
| 86          | 3.21     | 2.87     | -65             | -47      | 0        | Middle temporal gyrus              |
| 83          | 3.17     | 2.85     | -38             | 29       | -6       | Orbital inferior frontal gyrus     |
|             | 3.07     | 2.77     | -42             | 35       | -3       | Inferior frontal gyrus             |
| 21          | 3.16     | 2.84     | -50             | -6       | -8       | Anterior superior temporal lobe    |
| 17          | 3.12     | 2.81     | -20             | 8        | 14       | Caudate/dorsal putamen             |
| 10          | 3.08     | 2.78     | 45              | 29       | -14      | Lateral orbitofrontal cortex       |
| 19          | 3.08     | 2.78     | 53              | 3        | 5        | Lateral precentral gyrus           |
| 17          | 3.08     | 2.78     | -56             | -39      | 12       | Posterior temporal gyrus           |
| 18          | 3.02     | 2.73     | -66             | -9       | -8       | Middle temporal gyrus              |
| 18          | 2.99     | 2.71     | -54             | -5       | -15      | Posterior superior temporal sulcus |
| 11          | 2.93     | 2.67     | -59             | -24      | 2        | Superior temporal sulcus           |

*k*, cluster threshold; MNI, Montreal Neurological Institute; *Z*, *Z* statistic.

\*Globus pallidus region is discussed in the main text.

**Table S2. Whole-brain analysis: Activations derived from the negative contrasts of win CS, loss CS, and shock CS values (exploratory  $P < 0.005$ ,  $k \geq 10$ )**

| <i>k</i>             | <i>t</i> | <i>Z</i> | MNI coordinates |          |          | Region                                           |
|----------------------|----------|----------|-----------------|----------|----------|--------------------------------------------------|
|                      |          |          | <i>x</i>        | <i>y</i> | <i>z</i> |                                                  |
| Negative shock value |          |          |                 |          |          |                                                  |
| 85                   | 3.41     | 3.03     | 23              | 20       | -23      | Posterior orbitofrontal cortex                   |
| 51                   | 3.37     | 2.99     | 39              | -3       | -18      | Clastrum                                         |
| 19                   | 3.34     | 2.97     | -23             | 15       | -23      | Posterior orbitofrontal cortex                   |
| 40                   | 3.24     | 2.90     | -26             | 33       | -20      | Medial orbitofrontal gyrus                       |
| 50                   | 3.22     | 2.88     | 44              | -75      | 6        | Middle temporal gyrus                            |
| 28                   | 3.13     | 2.82     | -26             | 9        | -12      | Piriform claustrum/ventral striatum              |
| 20                   | 3.11     | 2.80     | -21             | -11      | -15      | Amygdala                                         |
| 14                   | 3.09     | 2.78     | 29              | 9        | -20      | Piriform cortex                                  |
| 15                   | 3.02     | 2.73     | 44              | 15       | -20      | Anterior superior temporal cortex                |
| 37                   | 2.99     | 2.71     | -39             | 36       | -17      | Orbitofrontal cortex                             |
| Negative lose value  |          |          |                 |          |          |                                                  |
| 145                  | 3.78     | 3.28     | 39              | 36       | 6        | Lateral middle frontal gyrus                     |
| 65                   | 3.70     | 3.22     | 38              | -90      | 5        | Occipital gyrus                                  |
| 13                   | 3.27     | 2.92     | -8              | -5       | -8       | Lateral hypothalamus                             |
| 63                   | 3.22     | 2.88     | -5              | 18       | -15      | Medial posterior orbitofrontal cortex            |
|                      | 3.08     | 2.78     | -8              | 23       | -21      |                                                  |
| 36                   | 3.20     | 2.87     | 18              | 57       | 8        | Superior frontal gyrus                           |
| 12                   | 2.97     | 2.69     | -21             | 20       | -14      | Lateral posterior orbitofrontal cortex           |
| Negative win value   |          |          |                 |          |          |                                                  |
| 126                  | 4.26     | 3.60     | 18              | 17       | -17      | Posterior orbitofrontal cortex                   |
| 215                  | 3.85     | 3.33     | -12             | -20      | -12      | Subthalamic nucleus/substantia nigra             |
|                      | 3.56     | 3.13     | -6              | -27      | -11      | Central tegmental tract ext. periaqueductal gray |
|                      | 3.38     | 3        | -14             | -9       | -14      | Amygdala                                         |
| 19                   | 3.26     | 2.91     | 14              | -30      | -3       | Medial geniculate nucleus                        |

ext., extending into.

**Table S3. Psychophysiological interaction analysis: Main effect of connectivity with the habenula over all levels of the psychological factor ( $P < 0.05$  family-wise error) and also as a function of increasing shock CS value and increasing win CS value (exploratory  $P < 0.005$ ,  $k \geq 10$ )**

| k                                                      | t     | Z    | MNI coordinates |     |     | Region                              |
|--------------------------------------------------------|-------|------|-----------------|-----|-----|-------------------------------------|
|                                                        |       |      | x               | y   | z   |                                     |
| Main effect connectivity with habenula                 |       |      |                 |     |     |                                     |
| 6,994                                                  | 21.52 | Inf  | 5               | -24 | 2   | Habenula                            |
|                                                        | 9.35  | 5.88 | 20              | -21 | -2  | Ventral posterior thalamus*         |
|                                                        | 8.02  | 5.43 | -2              | -12 | -2  | Ventral anterior thalamus*          |
|                                                        | 7.43  | 5.2  | -8              | -8  | -3  | Globus pallidus*                    |
|                                                        | 6.97  | 4.94 | -11             | 5   | 6   | Medial caudate*                     |
|                                                        | 6.76  | 4.92 | 11              | 6   | 12  | Medial caudate*                     |
| 598                                                    | 8.52  | 5.61 | -56             | -17 | 14  | Parietal operculum                  |
| 283                                                    | 7.97  | 5.41 | 18              | 12  | -8  | Ventral striatum*                   |
|                                                        | 6.49  | 4.8  | 27              | 2   | -12 | Amygdala*                           |
|                                                        | 6.14  | 4.64 | 32              | -5  | -8  | Clastrum                            |
| 834                                                    | 7.83  | 5.36 | 66              | -24 | -8  | Middle temporal gyrus               |
|                                                        | 7.73  | 5.32 | 57              | -26 | -8  | Middle temporal gyrus               |
|                                                        | 7     | 5.03 | 56              | -12 | 11  | Parietal operculum                  |
| 1,470                                                  | 7.35  | 5.17 | 47              | -66 | 8   | Posterior superior temporal sulcus  |
|                                                        | 7.02  | 5.03 | 60              | -48 | 11  |                                     |
|                                                        | 6.86  | 4.96 | 56              | -42 | 14  |                                     |
| 592                                                    | 7.29  | 5.15 | -12             | -65 | 8   | Primary visual cortex/BA17          |
| 139                                                    | 7.21  | 5.11 | -63             | 6   | 5   | Inferior frontal gyrus              |
| 908                                                    | 7.07  | 5.05 | 18              | -60 | 9   | Primary visual cortex/BA17          |
|                                                        | 6.98  | 5.02 | 6               | -77 | 6   |                                     |
|                                                        | 6.36  | 4.74 | -2              | -87 | 17  |                                     |
| 142                                                    | 6.84  | 4.95 | -35             | -33 | 17  | Posterior insula                    |
| 50                                                     | 6.49  | 4.8  | -56             | -51 | 15  | Posterior superior temporal sulcus  |
| 24                                                     | 6.39  | 4.75 | 57              | 0   | -15 | Anterior superior temporal sulcus   |
| 53                                                     | 6.27  | 4.7  | -39             | -81 | 15  | Occipital/angular gurus             |
| 80                                                     | 6.21  | 4.67 | -48             | -68 | 17  | Angular gyrus                       |
|                                                        | 6.17  | 4.65 | -50             | -74 | 9   |                                     |
| Connectivity with habenula modulated by shock CS value |       |      |                 |     |     |                                     |
| 59                                                     | 3.95  | 3.39 | -15             | 15  | -23 | Posterior orbitofrontal cortex*     |
| 294                                                    | 3.79  | 3.29 | 3               | 15  | -12 | Subcallosal anterior cingulate*     |
|                                                        | 3.58  | 3.14 | 6               | 17  | -20 |                                     |
| 218                                                    | 3.75  | 3.26 | 56              | -23 | 6   | Superior temporal gyrus             |
|                                                        | 3.7   | 3.23 | 65              | -32 | 14  | Posterior superior temporal gyrus   |
| 22                                                     | 3.4   | 3.01 | -12             | -12 | -9  | Globus pallidus internus            |
| 64                                                     | 3.39  | 3    | -18             | 2   | -21 | Amygdala*                           |
| 26                                                     | 3.38  | 3    | -14             | -51 | 5   | Posterior cingulate gyrus           |
| 26                                                     | 3.33  | 2.97 | 42              | 30  | 3   | Medial frontal gyrus                |
| 24                                                     | 3.27  | 2.92 | 39              | -12 | -14 | Insular claustrum                   |
| 65                                                     | 3.19  | 2.86 | -21             | -44 | 11  | Occipital/cingulate gyrus/ventricle |
| 19                                                     | 3.08  | 2.78 | -56             | 29  | -3  | Inferior frontal gyrus              |
| 12                                                     | 3.01  | 2.72 | 23              | 12  | -21 | Posterior orbitofrontal cortex      |
| 27                                                     | 3.01  | 2.9  | 62              | -8  | 3   | Temporal gyrus                      |
| 17                                                     | 2.9   | 2.64 | -71             | -27 | -2  | Superior temporal gyrus             |
| Connectivity with habenula modulated by win CS value   |       |      |                 |     |     |                                     |
| 172                                                    | 3.54  | 3.11 | 23              | 18  | -3  | Ventral striatum*                   |
|                                                        | 3.31  | 2.95 | 18              | 24  | -9  | Anterior putamen                    |
| 22                                                     | 3.34  | 2.97 | -21             | 18  | -12 | Insular claustrum                   |

BA17, Brodmann area 17; Inf, infinite.

\*These regions are discussed in the main text.
